# Supplementary material
Source: Elsevier journal article supplement (https://www.sciencedirect.com/science/article/pii/S2174204921000015)
Supplement: mmc1 [file S2174204921000015:mmc1.doc]

Anexo 1 -

**Lista de Abreviaturas**

A. Aldosterona: Antagonistas da Aldosterona

AAS: Ácido acetilsalicílico

ACC: Antagonistas dos Canais de Cálcio

AUC: *Area under Curve*

ARA: Antagonistas dos Recetores da Angiotensina

BAV: Bloqueio Auriculoventricular

BB: Betabloqueante

BCRD: Bloqueio Completo de Ramo Direito

BCRE: Bloqueio Completo de Ramo Esquerdo

CABG: Cirurgia de *Bypass* Coronário

CDI: Cardiodesfibrilhador Implantável

DC: Doença Cardíaca

DPOC: Doença Pulmonar Obstrutiva Crónica

DVP: Doença Vascular Periférica

EAM: Enfarte Agudo do Miocárdio

FA: Fibrilhação Auricular

FC: Frequência Cardíaca

FEVE: Fração de Ejeção do Ventrículo Esquerdo

FRCV: Fatores de Risco Cardiovascular

h: Horas

HcICP: Hospitais com Intervenção Coronária Percutânea *on-site*

HsICP: Hospitais sem Intervenção Coronária Percutânea *on-site*

HTA: Hipertensão arterial

IC: Intervalo de confiança a 95%

ICC: Insuficiência Cardíaca Congestiva

ICP: Intervenção Coronária Percutânea

IR: Insuficiência Renal

iECA: inibidores da Enzima Conversora da Angiotensina

IMC: Índice de Massa Corporal

KK: Classe de Killip

Kg: Quilograma

OR: *Odds Ratio*

PCR: Paragem Cardiorrespiratória

P.H. : Perfil Hemodinâmico

PM: *Pacemaker*

P25: Percentil 25

P75: Percentil 75

SCA: Síndrome Coronária Aguda

SdP: *Score* de Propensão

SPSS: *Statistical Package for Social Sciences*

SU: Serviço de Urgência

TAD: Tensão Arterial Diastólica

TAS: Tensão Arterial Sistólica

TV: Taquicardia Ventricular

UCI: Unidade de Cuidados Intensivos

VKA: Antagonista da Vitamina K

VV: Via Verde

Anexo 2 –

**Score de Propensão em SCA com supraST: Variáveis incluídas e respetivos pesos**

**Score de Propensão em SCA sem supraST: Variáveis incluídas e respetivos pesos**
